# Supplementary material for: Flavanomarein inhibits high glucose-stimulated epithelial-mesenchymal transition in HK-2 cells via targeting spleen tyrosine kinase
Source: Sci Rep. 2020 Jan 16;10:439. doi: 10.1038/s41598-019-57360-4 (PMC6965095; doi:10.1038/s41598-019-57360-4)
Supplement: Supplementary file 1 — Supplemental figure. 1. [file 41598_2019_57360_MOESM1_ESM.pdf]

# Flavanomarein inhibits high glucose-stimulated epithelial-mesenchymal transition in HK-2 cells via targeting spleen tyrosine kinase

Nan-nan Zhang<sup>1,2</sup>, Jin-sen Kang<sup>2</sup>, Shuai-Shuai Liu<sup>3</sup>, Si-Meng Gu<sup>3</sup>, Zhi-peng Song<sup>1,2</sup>,  
Feng-xiang Li<sup>2</sup>, Li-feng Wang<sup>4</sup>, Lan Yao<sup>5</sup>, Tian Li<sup>6</sup>, Lin-lin Li<sup>2</sup>, Ye Wang<sup>2</sup>, Xue-jun  
Li<sup>3\*</sup>, Xin-min Mao<sup>1,5\*</sup>

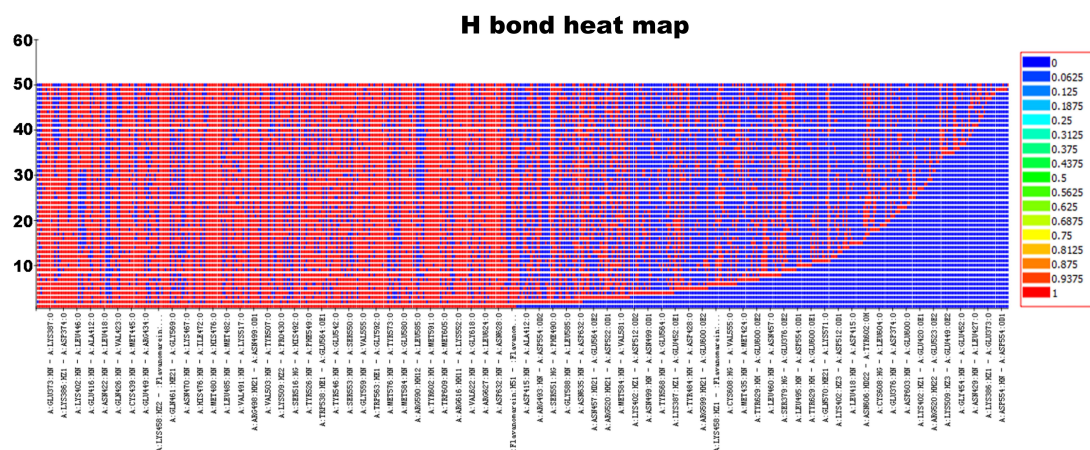

Supplemental figure. 1 Hydrogen bond heat map of the Syk -FM complex.
